# Supplementary material for: Chiral features of metal phthalocyanines sitting atop the pre-assembled TiOPc monolayer on Ag(111)
Source: Royal Society of Chemistry journal article supplement (doi:10.1039/c9cp03198g), 2019-01-01
Supplement: c9cp03198g1.pdf [file c9cp03198g1.pdf]

## Supporting Information

### Chiral features of metal phthalocyanines sitting atop pre-assembled TiOPc monolayer on Ag(111)

Hao Zhu,<sup>a</sup> Huanjun Song,<sup>a,b</sup> Wenhui Zhao,<sup>a</sup> Zhantao Peng,<sup>a</sup> Dan Liu,<sup>a</sup> Lingbo Xing,<sup>a</sup> Jingxin Dai,<sup>a</sup> Zhichao Huang,<sup>a</sup> Peilin Liao,<sup>\*c</sup> Yuan Wang<sup>\*a</sup> and Kai Wu<sup>\*a</sup>

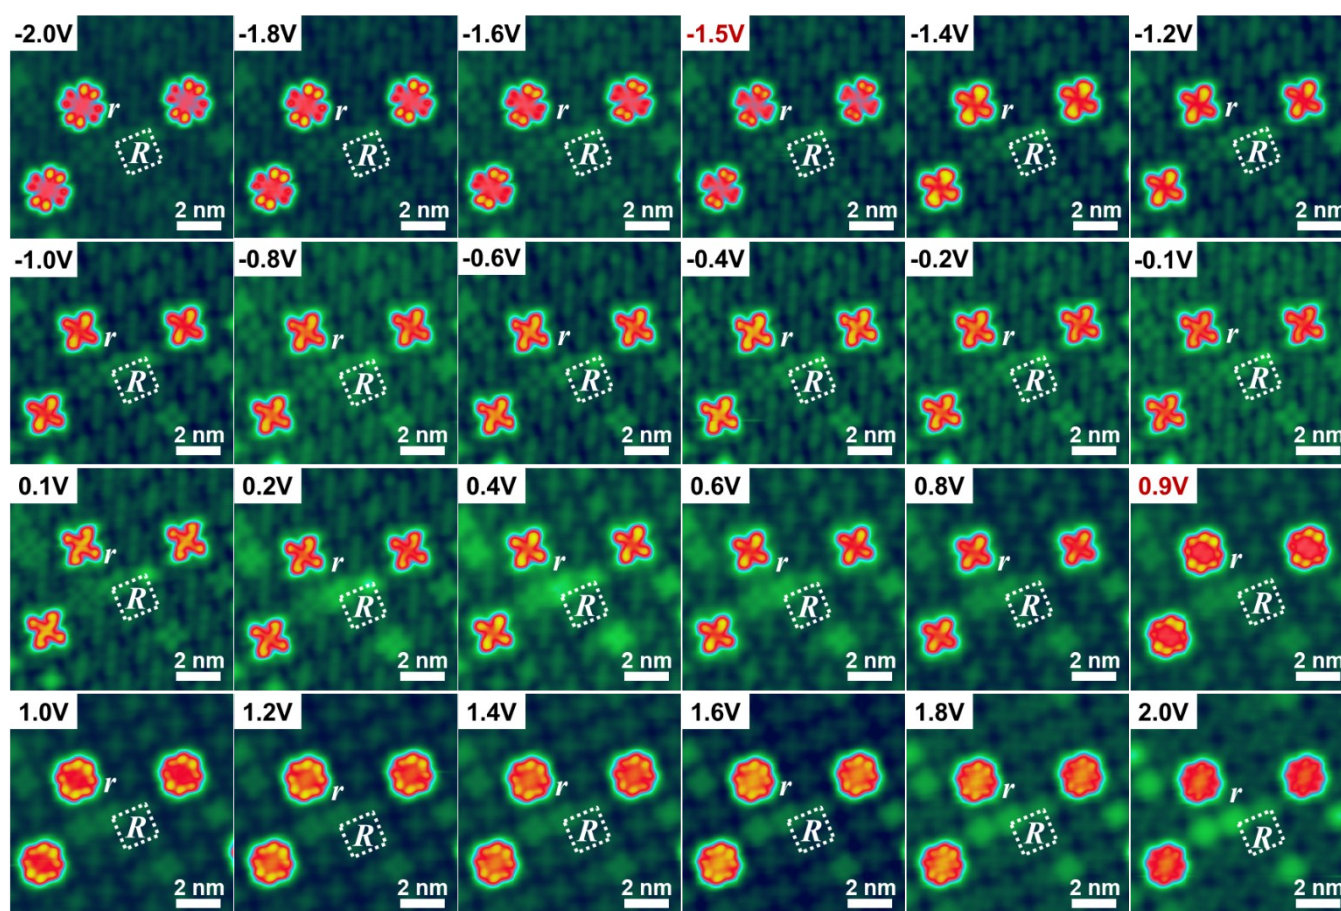

Fig. S1 Constant current STM images of the second-layer TiOPc molecules adsorbed on self-assembled TiOPc monolayer with an *Rr* chirality at various bias voltages.

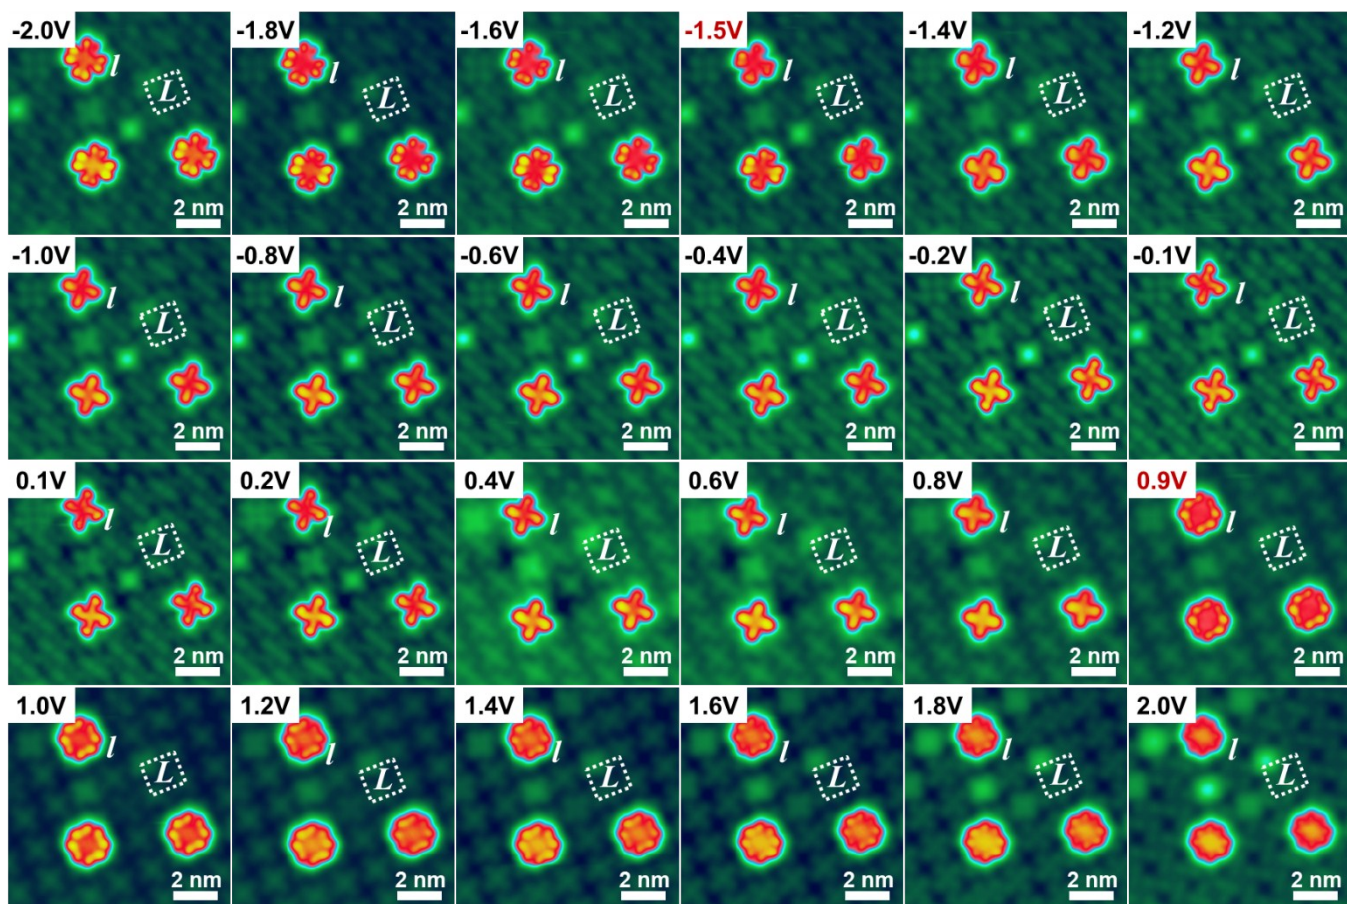

Fig. S2 Constant current STM images of the second-layer TiOPc molecules adsorbed on self-assembled TiOPc monolayer with an *L* chirality at various bias voltages.
